# Supplementary material for: Identification of CB1 Ligands among Drugs, Phytochemicals and Natural-Like Compounds: Virtual Screening and In Vitro Verification
Source: PubMed Central journal article supplement (PMC9585589; doi:10.1021/acschemneuro.2c00502), 2022-10-05
Supplement: cn2c00502_si_001.pdf [file cn2c00502_si_001.pdf]

Supporting Information:  
Identification of CB1 Ligands among Drugs,  
Phytochemicals and Natural-Like Compounds:  
Virtual Screening and In Vitro Verification

Adam Stasiulewicz,<sup>†,‡</sup> Anna Lesniak,<sup>¶</sup> Piotr Setny,<sup>‡</sup> Magdalena  
Bujalska-Zadrozny,<sup>¶</sup> and Joanna I. Sulkowska<sup>\*,‡</sup>

<sup>†</sup>*Department of Drug Chemistry, Faculty of Pharmacy, Medical University of Warsaw,  
Banacha 1, 02-097 Warsaw, Poland*

<sup>‡</sup>*Centre of New Technologies, University of Warsaw, Banacha 2c, 02-097 Warsaw, Poland*

<sup>¶</sup>*Department of Pharmacodynamics, Faculty of Pharmacy, Medical University of Warsaw,  
Banacha 1, 02-097 Warsaw, Poland*

E-mail: [j.sulkowska@cent.uw.edu.pl](mailto:j.sulkowska@cent.uw.edu.pl)

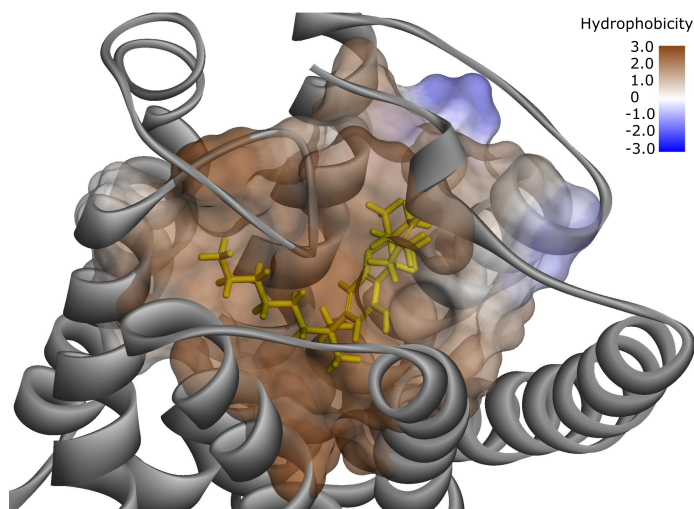

Figure S1: Hydrophobic surface of the CB1 binding site, based on PDB ID: 5XR8.

Table S1: Results of the first iteration VS for the compounds selected for in vitro binding assay.

| ID | PMF04  | RMSD (Å)     |              |              |
|----|--------|--------------|--------------|--------------|
|    |        | Trajectory 1 | Trajectory 2 | Trajectory 3 |
| 1  | -151.4 | 1.7          | 2.5          | 1.9          |
| 2  | -136.1 | 1.3          | 1.3          | 1.8          |
| 3  | -137.0 | 1.2          | 1.3          | 1.3          |
| 4  | -131.8 | 1.7          | 2.5          | 1.3          |
| 5  | -149.4 | 1.3          | 1.2          | 1.7          |
| 6  | -138.4 | 2.0          | 1.6          | 1.4          |
| 7  | -144.0 | 0.8          | 0.9          | 1.0          |
| 8  | -169.0 | 1.7          | 2.7          | 1.3          |
| 9  | -153.7 | 1.9          | 1.1          | 1.8          |
| 10 | -142.6 | 1.1          | 1.5          | 1.4          |
| 11 | -166.7 | 1.5          | 1.1          | 1.9          |
| 12 | -166.8 | 1.4          | 1.0          | 1.4          |
| 13 | -159.0 | 1.2          | 3.1          | 2.4          |
| 14 | -131.9 | 1.3          | 1.3          | 1.2          |
| 15 | -164.5 | 1.5          | 1.6          | 1.4          |
| 16 | -152.0 | 3.0          | 1.3          | 1.1          |
| 17 | -173.6 | 1.4          | 2.7          | 1.0          |
| 18 | -155.5 | 1.4          | 3.7          | 0.9          |
| 19 | -148.3 | 2.7          | 1.6          | 1.9          |
| 20 | -154.3 | 1.4          | 1.1          | 0.9          |
| 21 | -151.4 | 0.7          | 1.5          | 0.7          |
| 22 | -182.8 | 1.2          | 1.4          | 1.3          |



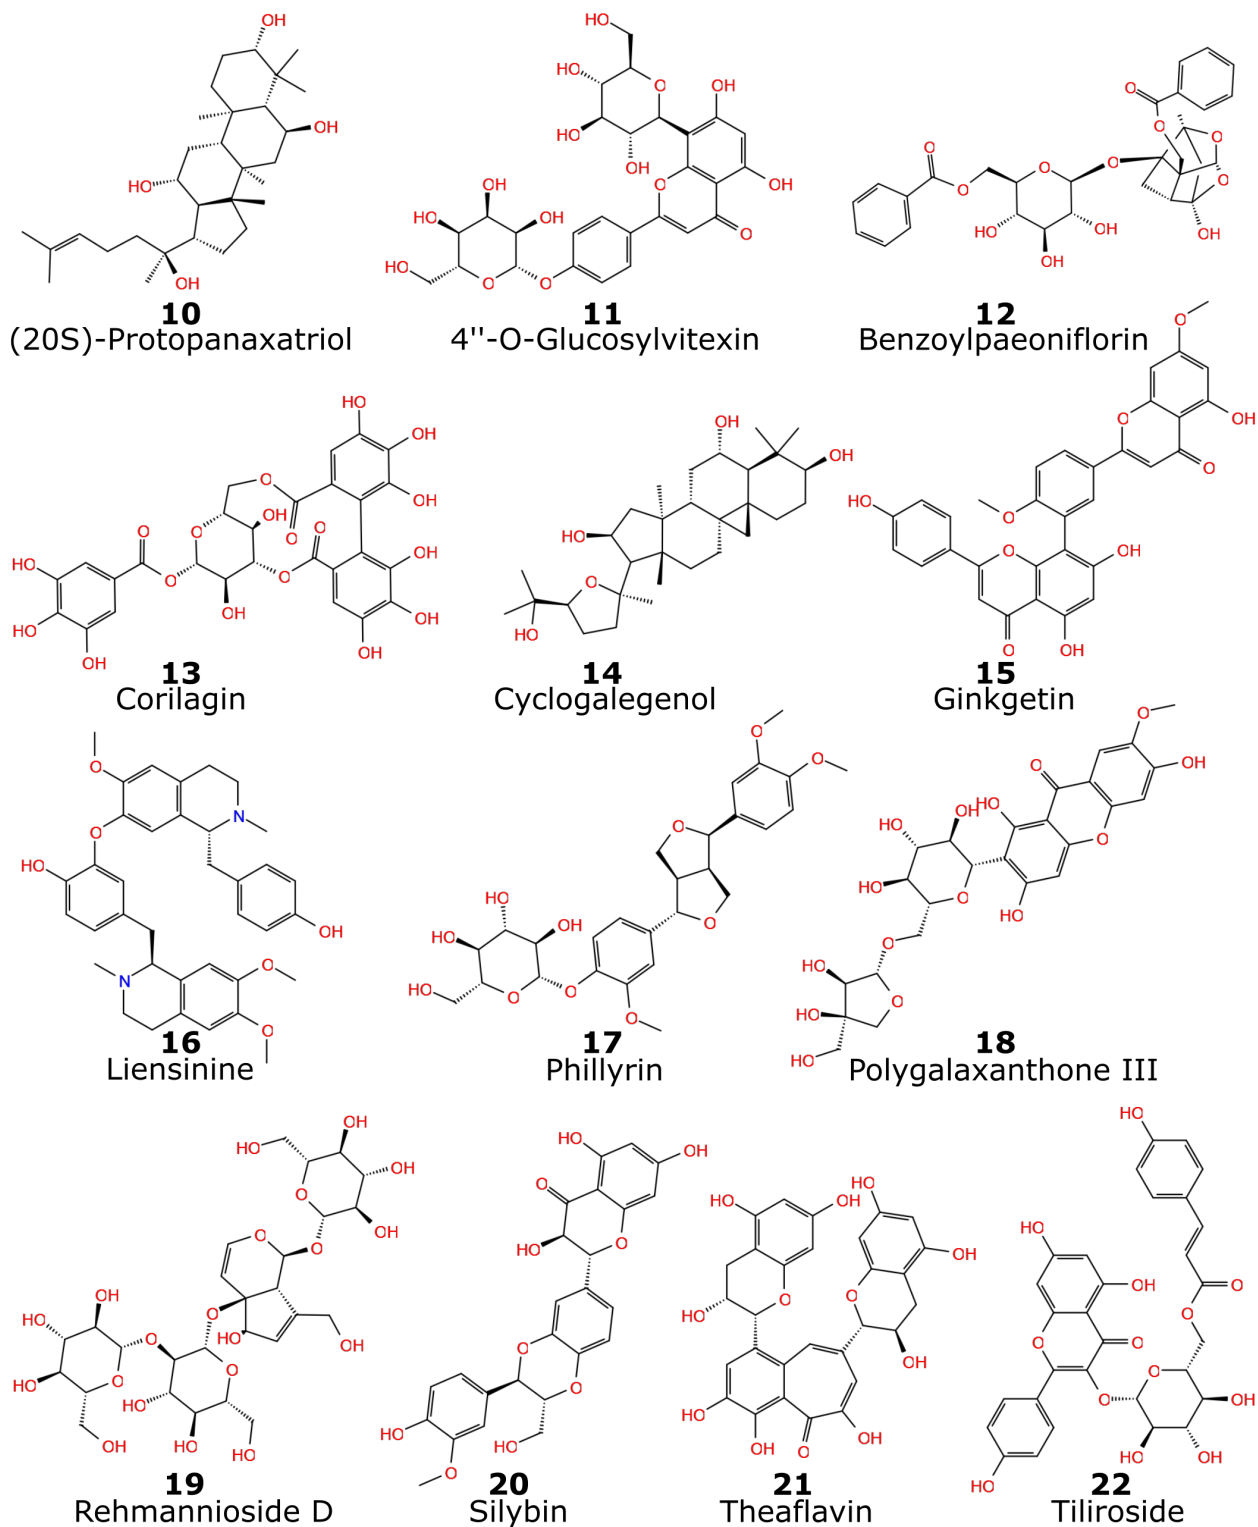

Figure S3: Structural formulas of the phytochemical compounds from the first iteration selected for the in vitro binding assay.

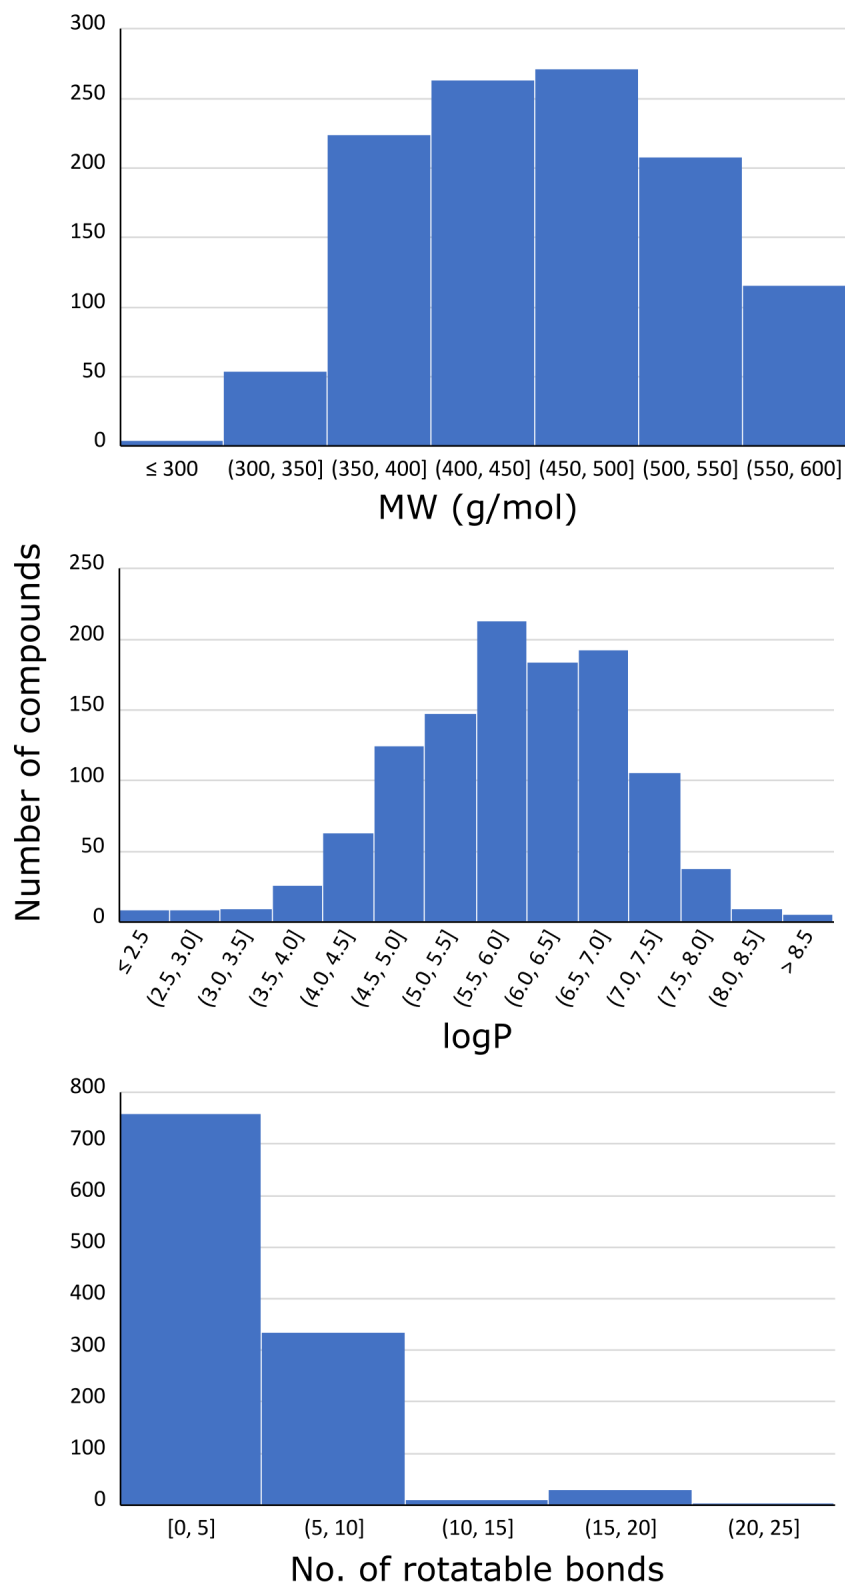

Figure S4: Histograms of MW and computed logP and number of rotatable bonds of CB1 ligands with  $K_i \leq 100$  nM deposited in ChEMBL.

Table S2: Statistical parameters of the prepared QSAR models.

| Model code       | Score  | R <sup>2</sup> | Q <sup>2</sup> | SD     | RMSE   |
|------------------|--------|----------------|----------------|--------|--------|
| kpls_linear_9    | 0.5690 | 0.7366         | 0.6366         | 0.5881 | 0.6931 |
| kpls_linear_7    | 0.5620 | 0.7299         | 0.6254         | 0.5967 | 0.7000 |
| kpls_dendritic_7 | 0.5572 | 0.7442         | 0.6282         | 0.5806 | 0.6974 |
| kpls_linear_2    | 0.5495 | 0.7399         | 0.6189         | 0.5861 | 0.7038 |
| kpls_dendritic_9 | 0.5458 | 0.8139         | 0.6541         | 0.4945 | 0.6762 |
| kpls_linear_8    | 0.5458 | 0.8113         | 0.6471         | 0.4993 | 0.6774 |
| kpls_linear_19   | 0.5450 | 0.7395         | 0.6192         | 0.5856 | 0.7068 |
| kpls_linear_4    | 0.5446 | 0.8142         | 0.6504         | 0.4948 | 0.6769 |
| kpls_linear_29   | 0.5444 | 0.6712         | 0.5907         | 0.6579 | 0.7323 |
| kpls_dendritic_2 | 0.5442 | 0.7485         | 0.6188         | 0.5763 | 0.7038 |

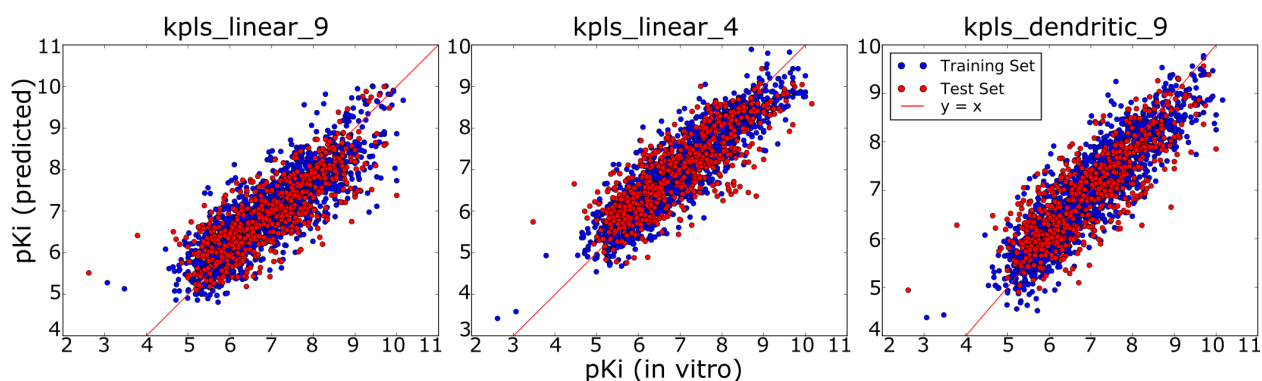

Figure S5: Scatter plots showing correlation of QSAR-predicted and in vitro pK<sub>i</sub> values for training and test sets for the best QSAR models based on AutoQSAR score (kpls\_linear\_9), R<sup>2</sup> (kpls\_linear\_4), and Q<sup>2</sup> (kpls\_dendritic\_9).

Table S3: Cutoffs for the physicochemical properties used for separate filtration of potential CB1 agonists and antagonists/inverse agonists.

| Property               | Agonists | Antagonists |
|------------------------|----------|-------------|
| MW (g/mol)             | ≤ 500    | ≤ 600       |
| logP                   | 3.5–8    | 3–8         |
| HBD                    | ≤ 5      | ≤ 5         |
| HBA                    | ≤ 10     | ≤ 10        |
| PSA (Å <sup>2</sup> )  | ≤ 140    | ≤ 140       |
| No. of rotatable bonds | ≤ 20     | ≤ 10        |

Table S4: Computed physicochemical properties of the compounds from the second iteration VS selected for in vitro binding assay.

| ID | ZINC ID          | MW (g/mol) | logP | HBD | HBA | No. of rotatable bonds | PSA ( $\text{\AA}^2$ ) |
|----|------------------|------------|------|-----|-----|------------------------|------------------------|
| 23 | ZINC000002117717 | 427.45     | 6.5  | 2   | 4   | 5                      | 59.0                   |
| 24 | ZINC000005158610 | 424.49     | 3.8  | 3   | 5   | 9                      | 117.3                  |
| 25 | ZINC000008790881 | 443.50     | 3.9  | 2   | 7   | 8                      | 100.6                  |
| 26 | ZINC000014690613 | 422.48     | 4.5  | 2   | 5   | 6                      | 102.5                  |
| 27 | ZINC000015953923 | 489.61     | 5.2  | 1   | 7   | 6                      | 88.6                   |
| 28 | ZINC000021362315 | 457.53     | 5.7  | 2   | 6   | 8                      | 97.5                   |
| 29 | ZINC000052509366 | 489.92     | 4.7  | 1   | 7   | 7                      | 101.2                  |
| 30 | ZINC000217658088 | 495.53     | 5.2  | 3   | 6   | 8                      | 110.5                  |
| 31 | ZINC000217830653 | 482.85     | 3.9  | 1   | 6   | 3                      | 120.9                  |
| 32 | ZINC000824654462 | 444.49     | 4.1  | 3   | 6   | 8                      | 97.2                   |
| 33 | ZINC000081139092 | 436.53     | 4.3  | 1   | 6   | 7                      | 32.5                   |
| 34 | ZINC000001832514 | 438.01     | 7.6  | 1   | 3   | 10                     | 26.4                   |
| 35 | ZINC000002119702 | 520.41     | 6.3  | 2   | 5   | 7                      | 74.6                   |
| 36 | ZINC000002149301 | 542.61     | 4.6  | 1   | 9   | 7                      | 135.9                  |
| 37 | ZINC000003033194 | 509.99     | 6.9  | 1   | 6   | 8                      | 74.3                   |
| 38 | ZINC000006040794 | 383.45     | 6.1  | 1   | 3   | 6                      | 45.9                   |
| 39 | ZINC000013629850 | 497.65     | 5.7  | 1   | 6   | 8                      | 83.1                   |
| 40 | ZINC000020237143 | 523.56     | 6.5  | 1   | 7   | 7                      | 100.5                  |
| 41 | ZINC000020904533 | 458.51     | 4.5  | 1   | 8   | 7                      | 82.7                   |
| 42 | ZINC000036062145 | 440.54     | 4.2  | 1   | 8   | 8                      | 84.1                   |
| 43 | ZINC000263585252 | 490.60     | 6.3  | 1   | 5   | 9                      | 82.6                   |
| 44 | ZINC000000538337 | 440.95     | 5.8  | 1   | 4   | 3                      | 51.0                   |
| 45 | ZINC000012503187 | 498.58     | 6.0  | 2   | 7   | 4                      | 83.6                   |

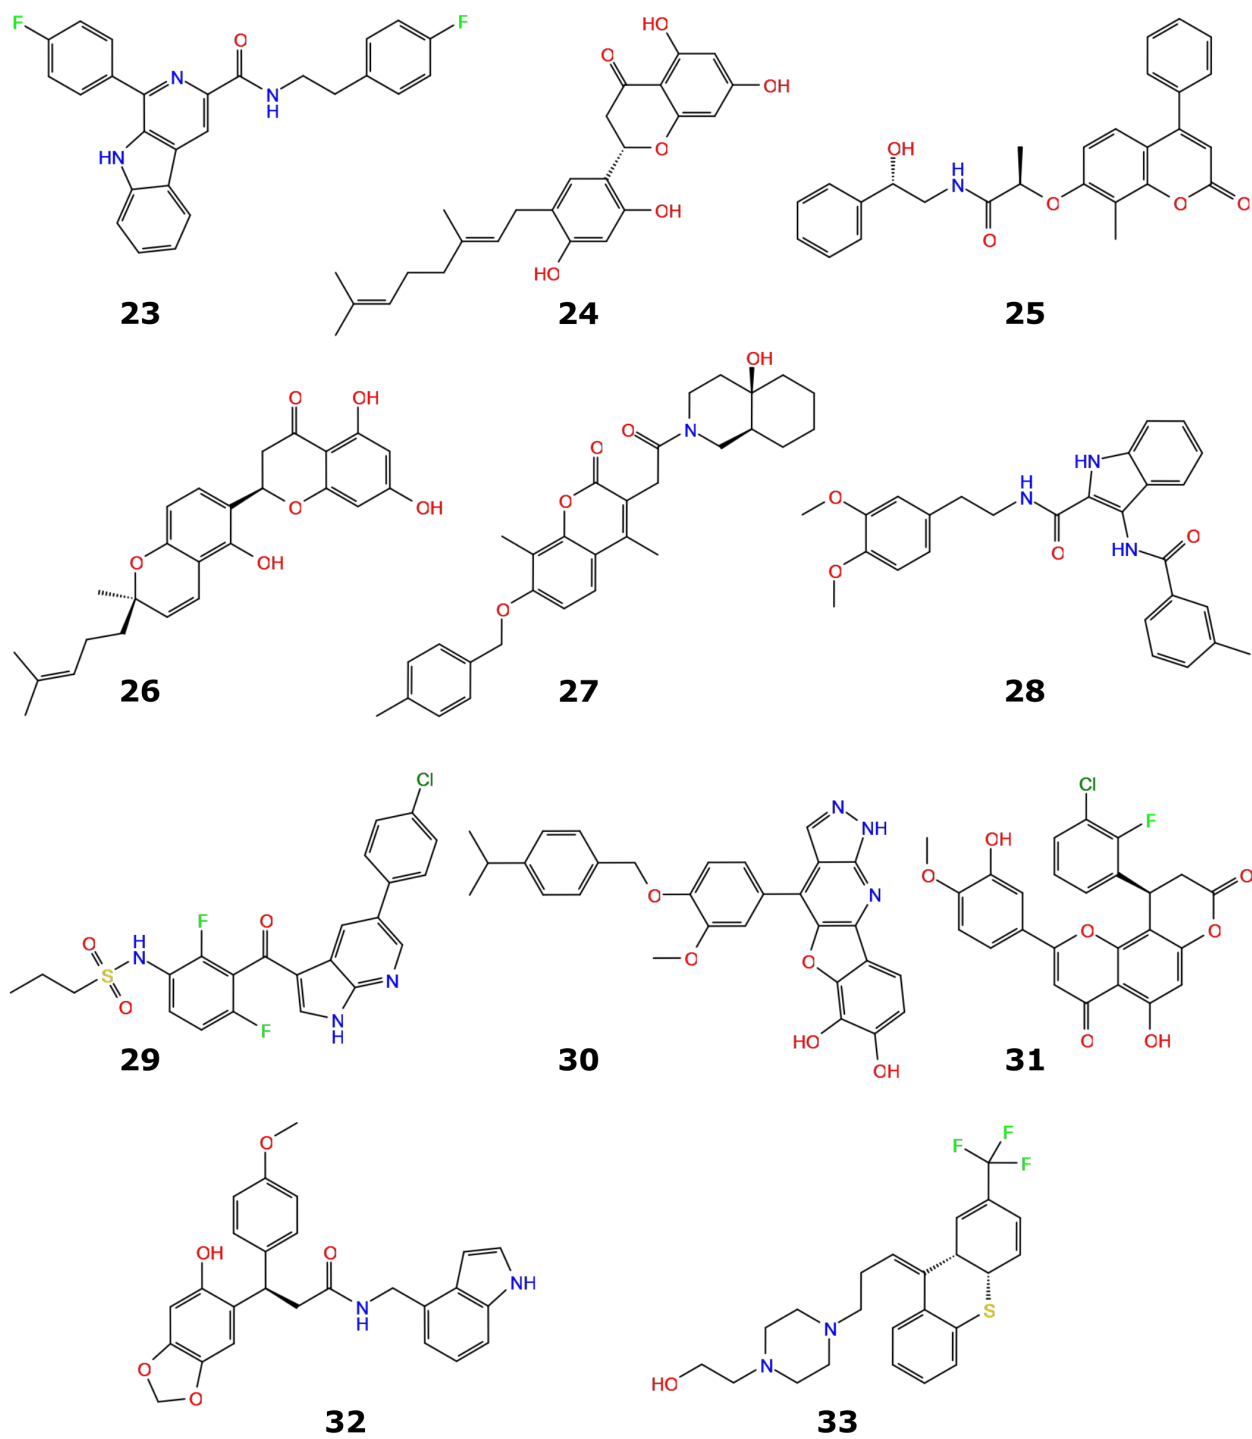

Figure S6: Structural formulas of the potential CB1 agonists from the second iteration selected for the in vitro binding assay.



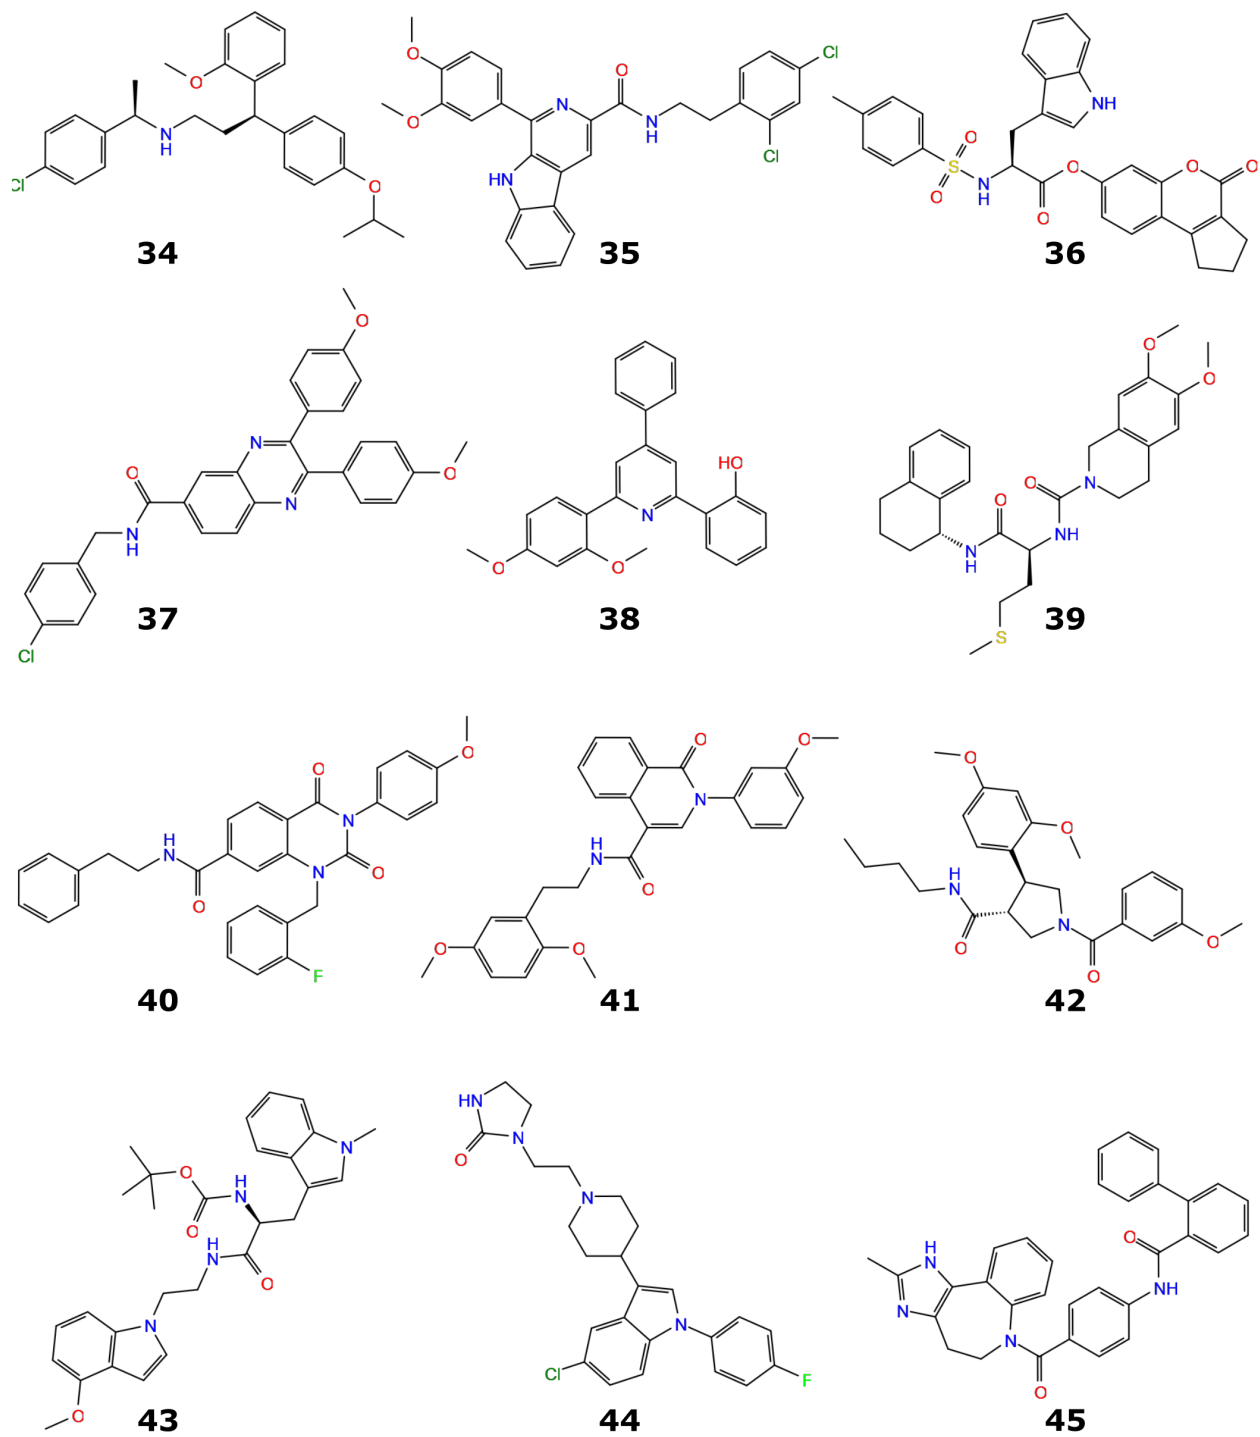

Figure S7: Structural formulas of the potential CB1 antagonists from the second iteration selected for the in vitro binding assay.

Table S5: Results of the first iteration  $K_i$  determination with [ $^3\text{H}$ ]CP-55,940 displacement assay.

| ID               | ZINC ID          | Name                              | $\text{p}K_i \pm \text{SEM}$ | $K_i$ ( $\mu\text{M}$ , 95% CI) |
|------------------|------------------|-----------------------------------|------------------------------|---------------------------------|
| 1 <sup>a</sup>   | ZINC000001538857 | Bosentan                          | $3.59 \pm 0.09$              | 259 (166–403)                   |
| 2 <sup>b</sup>   | ZINC000052716421 | Flibanserin                       | $3.96 \pm 0.08$              | 109 (73.9–160)                  |
| 3                | ZINC000001548097 | Iloperidone                       | $4.05 \pm 0.12$              | 87.9 (49.8–155.4)               |
| 4                | ZINC000003927822 | Lurasidone                        | $4.40 \pm 0.09$              | 39.8 (25.2–63)                  |
| 5 <sup>b,c</sup> | ZINC000019796087 | Nicardipine                       | no activity                  | no activity                     |
| 6                | ZINC000016159083 | Pimavanserin                      | $4.47 \pm 0.21$              | 34 (12–93)                      |
| 7                | ZINC000003964126 | Rivaroxaban                       | no activity                  | no activity                     |
| 8                | ZINC000028957444 | Ticagrelor                        | $4.44 \pm 0.29$              | 36 (8.8–148)                    |
| 9                | ZINC000004474682 | Travoprost                        | $5.40 \pm 0.14$              | 3.6 (1.8–7.4)                   |
| 10               | ZINC000043606386 | (20S)-Protopanaxatriol            | no activity                  | no activity                     |
| 11               | ZINC000299817443 | 4 <sup>?</sup> -O-Glucosylvitexin | no activity                  | no activity                     |
| 12               | ZINC000101324562 | Benzoylpaeoniflorin               | $3.75 \pm 0.09$              | 179 (104–307)                   |
| 13               | ZINC000004098612 | Corilagin                         | $4.20 \pm 0.12$              | 48 (26.8–85.9)                  |
| 14               | ZINC000068248924 | Cyclogalegenol                    | $3.76 \pm 0.20$              | 175 (64.3–474)                  |
| 15               | ZINC000001531664 | Ginkgetin                         | $5.06 \pm 0.16$              | 8.6 (3.8–19.2)                  |
| 16               | ZINC000206658454 | Liensinine                        | no activity                  | no activity                     |
| 17               | ZINC000056874329 | Phillyrin                         | $4.20 \pm 0.09$              | 62.8 (39.6–99.5)                |
| 18               | ZINC000085531601 | Polygalaxanthone III              | no activity                  | no activity                     |
| 19               | ZINC000253387896 | Rehmannioside D                   | no activity                  | no activity                     |
| 20 <sup>d</sup>  | ZINC000002033589 | Silybin                           | $3.78 \pm 0.16$              | 165 (76.7–354)                  |
| 21               | ZINC000095850257 | Theaflavin                        | no activity                  | no activity                     |
| 22               | ZINC000017654711 | Tiliroside                        | $4.33 \pm 0.11$              | 47.2 (26.5–84.1)                |
|                  |                  | Rimonabant (reference)            | $8.30 \pm 0.13$              | 0.0043 (0.0023–0.0088)          |

<sup>a</sup> Monohydrate; <sup>b</sup> hydrochloride; <sup>c</sup> racemic mixture; <sup>d</sup> mixture A and B.

Table S6: Results of the second iteration  $K_i$  determination with [ $^3\text{H}$ ]CP-55,940 displacement assay.

| ID              | ZINC ID          | Name                   | $\text{p}K_i \pm \text{SEM}$ | $K_i$ ( $\mu\text{M}$ , 95% CI) |
|-----------------|------------------|------------------------|------------------------------|---------------------------------|
| 23 <sup>a</sup> | ZINC000002117717 |                        | no activity                  | no activity                     |
| 24              | ZINC000005158610 | Kuwanon E              | $4.51 \pm 0.08$              | 31 (21–45)                      |
| 25 <sup>a</sup> | ZINC000008790881 |                        | $4.86 \pm 0.09$              | 13.9 (8.7–22)                   |
| 26              | ZINC000014690613 | Sanggenon N            | $4.71 \pm 0.05$              | 19 (15–24)                      |
| 27 <sup>a</sup> | ZINC000015953923 |                        | insoluble                    | insoluble                       |
| 28 <sup>a</sup> | ZINC000021362315 |                        | no activity                  | no activity                     |
| 29              | ZINC000052509366 | Vemurafenib            | no activity                  | no activity                     |
| 30              | ZINC000217658088 |                        | $6.07 \pm 0.09$              | 0.8 (0.6–1.1)                   |
| 31 <sup>a</sup> | ZINC000217830653 |                        | no activity                  | no activity                     |
| 32 <sup>a</sup> | ZINC000824654462 |                        | $5.20 \pm 0.10$              | 6.8 (3.8–10)                    |
| 33 <sup>b</sup> | ZINC000081139092 | Flupentixol            | $4.27 \pm 0.04$              | 53 (44 – 65)                    |
| 34 <sup>a</sup> | ZINC000001832514 |                        | $5.57 \pm 0.07$              | 2.7 (1.9–3.7)                   |
| 35 <sup>a</sup> | ZINC000002119702 |                        | $4.35 \pm 0.09$              | 44 (28–69)                      |
| 36 <sup>a</sup> | ZINC000002149301 |                        | $4.39 \pm 0.09$              | 41 (27–62)                      |
| 37              | ZINC000003033194 |                        | no activity                  | no activity                     |
| 38              | ZINC000006040794 |                        | $5.60 \pm 0.09$              | 2.5 (1.5–4.1)                   |
| 39 <sup>a</sup> | ZINC000013629850 |                        | $4.40 \pm 0.07$              | 40 (29 – 56)                    |
| 40              | ZINC000020237143 |                        | no activity                  | no activity                     |
| 41              | ZINC000020904533 |                        | no activity                  | no activity                     |
| 42 <sup>a</sup> | ZINC000036062145 |                        | no activity                  | no activity                     |
| 43              | ZINC000263585252 |                        | $5.18 \pm 0.07$              | 6.6 (4.7–9.4)                   |
| 44              | ZINC000000538337 | Sertindole             | $4.38 \pm 0.05$              | 42 (32–54)                      |
| 45              | ZINC000012503187 | Conivaptan             | no activity                  | no activity                     |
|                 |                  | Rimonabant (reference) | $8.30 \pm 0.13$              | 0.0043 (0.0023–0.0088)          |

<sup>a</sup> Racemic mixture; <sup>b</sup> dihydrochloride.

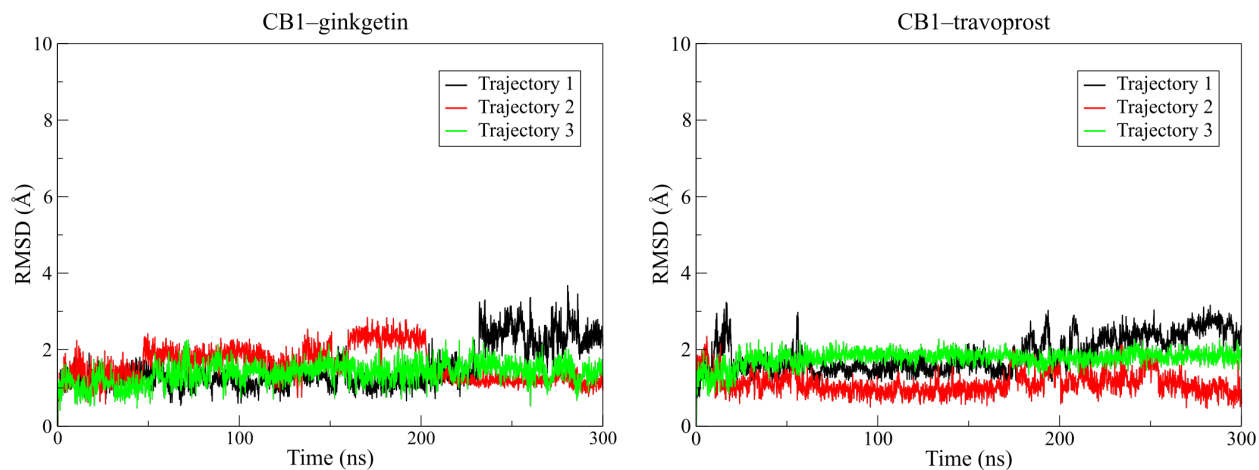

Figure S8: RMSD plots of ligands' heavy atoms from MD simulations of CB1-ginkgetin and CB1-travoprost complexes. RMSD computed after superposition on  $C_{\alpha}$  atoms with the exception of ICL3 (residues 307–335).

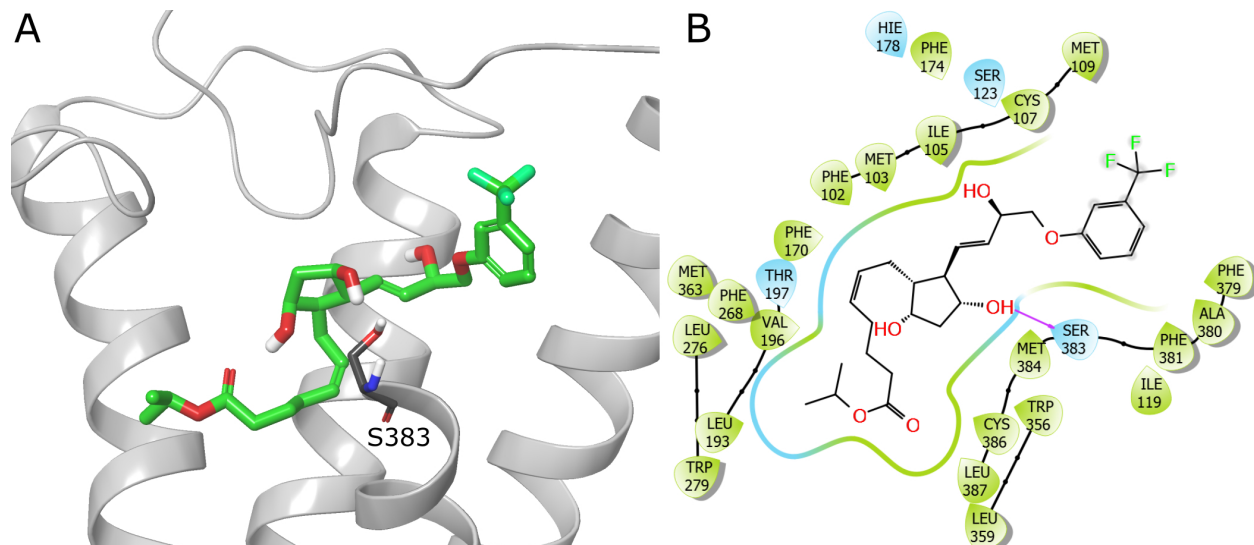

Figure S9: Putative binding mode of compound **9** (ZINC000004474682) from the second iteration. Panels (A) and (B) depict the pose and 2D interaction scheme obtained from docking to PDB ID: 5TGZ using Glide SP. Ligand is depicted in green stick representation, amino acids that are crucial for ligand binding—grey stick representation. Purple arrow—H-bond. Parts of TM6 and TM7 not shown to increase readability.

Table S7: Results of the second iteration methods applied for compounds selected from the first iteration.

| ID | Pred.<br>pK <sub>i</sub> | 5XR8     |          |                      |                      | 5TGZ     |                                                |                      |                                                            |
|----|--------------------------|----------|----------|----------------------|----------------------|----------|------------------------------------------------|----------------------|------------------------------------------------------------|
|    |                          | SP<br>DS | XP<br>DS | SP—constraints<br>DS | XP—constraints<br>DS | SP<br>DS | MM-GBSA<br>$\Delta G_{\text{bind}}$ (kcal/mol) | SP—constraints<br>DS | MM-GBSA—constraints<br>$\Delta G_{\text{bind}}$ (kcal/mol) |
| 1  | -                        | -        | -        | -                    | -                    | -        | -                                              | -                    | -                                                          |
| 2  | -2.1                     | -8.2     | -        | -8.8                 | -                    | -8.6     | -                                              | -7.5                 | -                                                          |
| 3  | -2.4                     | -8.9     | -        | -                    | -                    | -9.0     | -                                              | -8.2                 | -                                                          |
| 4  | -2.3                     | -        | -        | -                    | -                    | -8.9     | -                                              | -9.3                 | -                                                          |
| 5  | -3.2                     | -        | -        | -                    | -                    | -        | -                                              | -                    | -                                                          |
| 6  | -2.6                     | -        | -        | -                    | -                    | -        | -                                              | -                    | -                                                          |
| 7  | -                        | -        | -        | -                    | -                    | -        | -                                              | -                    | -                                                          |
| 8  | -                        | -        | -        | -                    | -                    | -        | -                                              | -                    | -                                                          |
| 9  | -2.2                     | -8.5     | -        | -10.4                | -3.8                 | -10.3    | -83.3                                          | -10.3                | -83.4                                                      |
| 10 | -2.9                     | -        | -        | -                    | -                    | -        | -                                              | -                    | -                                                          |
| 11 | -                        | -        | -        | -                    | -                    | -        | -                                              | -                    | -                                                          |
| 12 | -                        | -        | -        | -                    | -                    | -        | -                                              | -                    | -                                                          |
| 13 | -                        | -        | -        | -                    | -                    | -        | -                                              | -                    | -                                                          |
| 14 | -2.9                     | -        | -        | -                    | -                    | -        | -                                              | -                    | -                                                          |
| 15 | -                        | -        | -        | -                    | -                    | -        | -                                              | -                    | -                                                          |
| 16 | -                        | -        | -        | -                    | -                    | -        | -                                              | -                    | -                                                          |
| 17 | -                        | -        | -        | -                    | -                    | -        | -                                              | -                    | -                                                          |
| 18 | -                        | -        | -        | -                    | -                    | -        | -                                              | -                    | -                                                          |
| 19 | -                        | -        | -        | -                    | -                    | -        | -                                              | -                    | -                                                          |
| 20 | -                        | -        | -        | -                    | -                    | -        | -                                              | -                    | -                                                          |
| 21 | -                        | -        | -        | -                    | -                    | -        | -                                              | -                    | -                                                          |
| 22 | -                        | -        | -        | -                    | -                    | -        | -                                              | -                    | -                                                          |

DS, docking score.

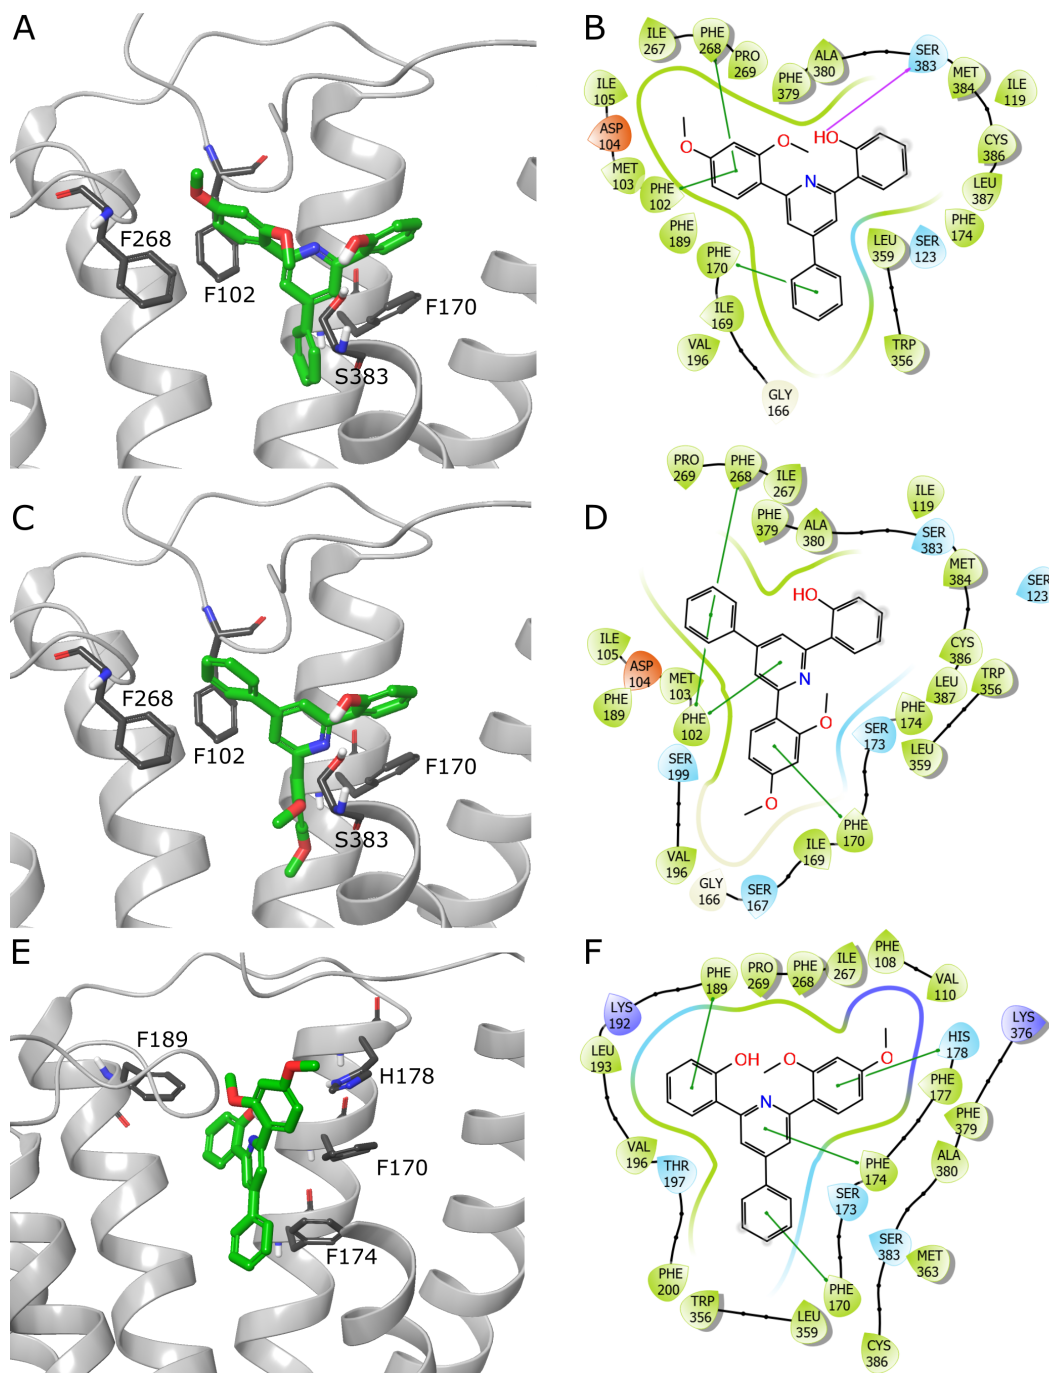

Figure S10: Putative binding modes of compound **38** (ZINC000006040794). Panels (A) and (B) depict the pose and 2D interaction scheme obtained from docking to PDB ID: 5TGZ using Glide SP, panels (C) and (D)—docking to PDB ID: 5TGZ using Glide SP with constraints on forming an H-bond with Ser383, while panels (E) and (F)—docking to PDB ID: 5XR8 using Glide XP. Ligands are depicted in green stick representation, amino acids that are crucial for ligand binding—grey stick representation. Purple arrow—H-bond; green line— $\pi$ - $\pi$  interaction. Parts of TM6 and TM7 not shown to increase readability.

Table S8: CB1 agonists with  $K_i < 100$  nM toward human CB1 used as active test compounds in validation of the second iteration docking and MM-GBSA.

| <b>Name/ID</b>  | <b><math>K_i</math> (nM)</b> | <b>Reference</b> |
|-----------------|------------------------------|------------------|
| ACEA            | 5.3                          | (1)              |
| Ajulemic acid   | 5.7                          | (2)              |
| AM-11542        | 0.11                         | (3)              |
| AM-411          | 6.8                          | (4)              |
| AM-841          | 1.14                         | (3)              |
| AMG-3           | 0.32                         | (5)              |
| Anandamide      | 70                           | (6)              |
| AZ-11713908     | 3.0                          | (7)              |
| BAY 38-7271     | 2.91                         | (8)              |
| BAY 59-3074     | 48.3                         | (9)              |
| CP-55,244       | 1                            | (10)             |
| CP-55,940       | 5.2                          | (11)             |
| EG-2201         | 22.4                         | (12)             |
| HU-210          | 0.06                         | (13)             |
| JWH-018         | 9                            | (12)             |
| JWH-147         | 11                           | (14)             |
| JWH-307         | 7.7                          | (14)             |
| MDMB-CHMCZCA    | 5.75                         | (12)             |
| MDMB-FUBINACA   | 0.098                        | (12)             |
| Noladin ether   | 25                           | (15)             |
| PSB-SB-1201     | 22                           | (16)             |
| UR-144          | 29                           | (17)             |
| WIN-55,212-2    | 13.3                         | (18)             |
| XLR-11          | 24                           | (17)             |
| $\Delta$ -9-THC | 22                           | (19)             |

Table S9: CB1 antagonists/inverse agonists with  $K_i < 100$  nM toward human CB1 used as active test compounds in validation of the second iteration docking and MM-GBSA.

| Name/ID       | $K_i$ (nM) | Reference |
|---------------|------------|-----------|
| AM-251        | 7.49       | (20)      |
| AM-281        | 12         | (21)      |
| AM-6538       | 3.4        | (22)      |
| AM-6545       | 1.7        | (23)      |
| CHEMBL201602  | 0.6        | (24)      |
| CHEMBL2063237 | 0.14       | (25)      |
| CHEMBL2063246 | 0.13       | (25)      |
| CHEMBL349955  | 81.5       | (20)      |
| CHEMBL482741  | 1.3        | (26)      |
| CHEMBL495891  | 14.96      | (27)      |
| CHEMBL496293  | 0.91       | (27)      |
| CHEMBL498783  | 1.2        | (27)      |
| CHEMBL568221  | 3.8        | (28)      |
| Drinabant     | 11         | (29)      |
| Ibipinabant   | 7.8        | (30)      |
| JD-5037       | 0.35       | (30)      |
| MRI-1867      | 2.3        | (31)      |
| NESS-0327     | 0.00035    | (32)      |
| O-2050        | 2.5        | (33)      |
| Otenabant     | 0.7        | (34)      |
| PF-0514273    | 1          | (26)      |
| PipISB        | 1.5        | (35)      |
| Rimonabant    | 6          | (36)      |
| Surinabant    | 3.5        | (37)      |
| Taranabant    | 0.13       | (38)      |

Table S10: Statistical parameters from the validation of docking and MM-GBSA protocols selected for the second iteration of VS.

| PDB ID | Method                | EF <sub>1%</sub> | EF <sub>2%</sub> | EF <sub>5%</sub> | BEDROC<br>$\alpha = 160.9$ | BEDROC<br>$\alpha = 20.0$ |
|--------|-----------------------|------------------|------------------|------------------|----------------------------|---------------------------|
| 5XR8   | Glide SP              | 24.0             | 18.0             | 7.2              | 0.568                      | 0.420                     |
| 5XR8   | Glide XP              | 32.0             | 20.0             | 9.6              | 0.551                      | 0.523                     |
| 5XR8   | Glide SP, constraints | 28.0             | 16.0             | 6.4              | 0.628                      | 0.367                     |
| 5XR8   | Glide XP, constraints | 32.0             | 18.0             | 8.0              | 0.672                      | 0.426                     |
| 5TGZ   | Glide SP              | 12.0             | 14.0             | 8.8              | 0.374                      | 0.443                     |
| 5TGZ   | MM-GBSA               | 32.0             | 16.0             | 6.4              | 0.639                      | 0.415                     |
| 5TGZ   | Glide SP, constraints | 32.0             | 20.0             | 9.6              | 0.580                      | 0.487                     |
| 5TGZ   | MM-GBSA, constraints  | 32.0             | 16.0             | 8.0              | 0.683                      | 0.423                     |



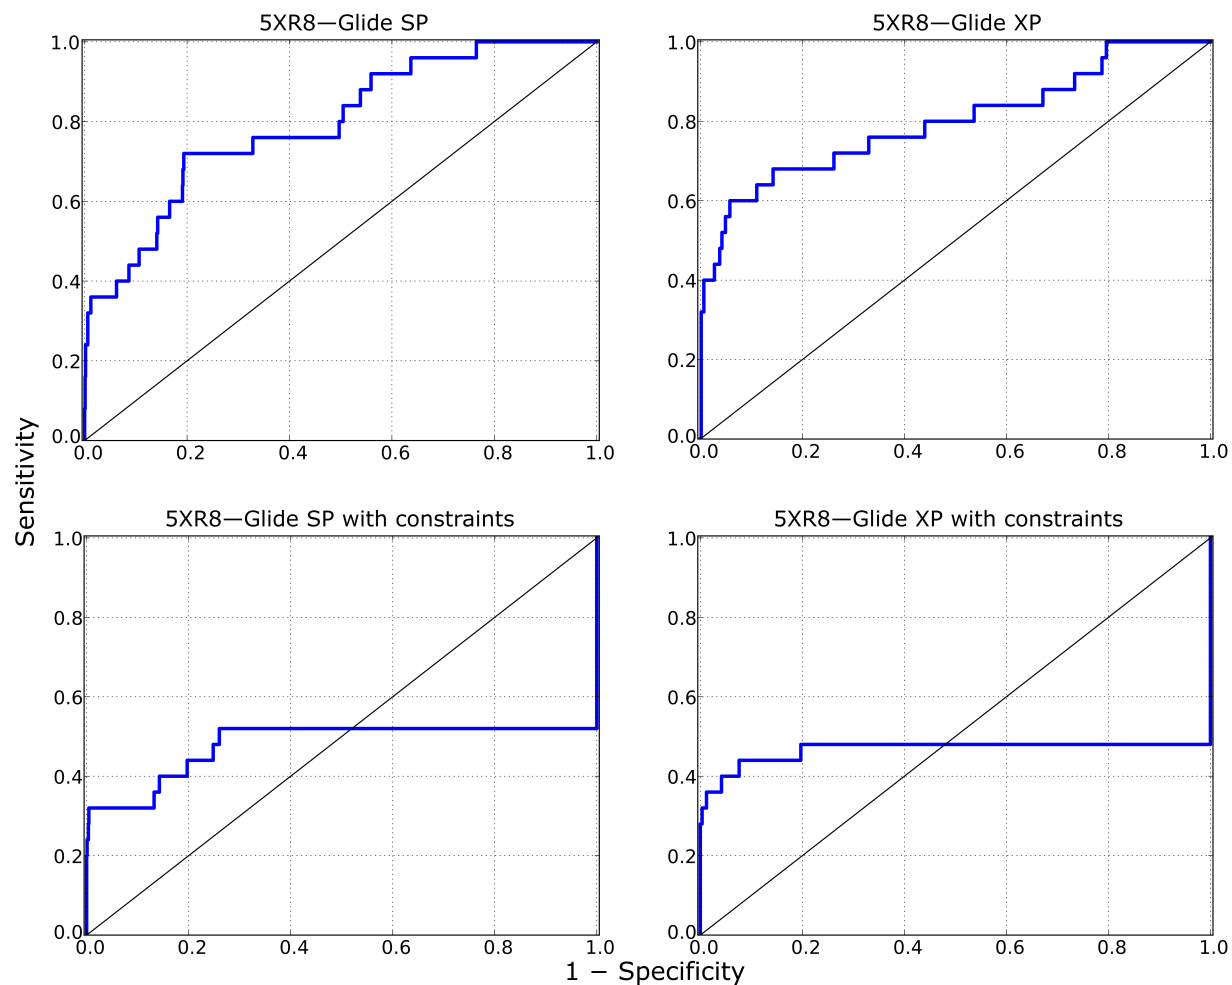

Figure S11: Receiver operating characteristic curves from the validation of docking with Glide to CB1 model based on PDB ID: 5XR8.

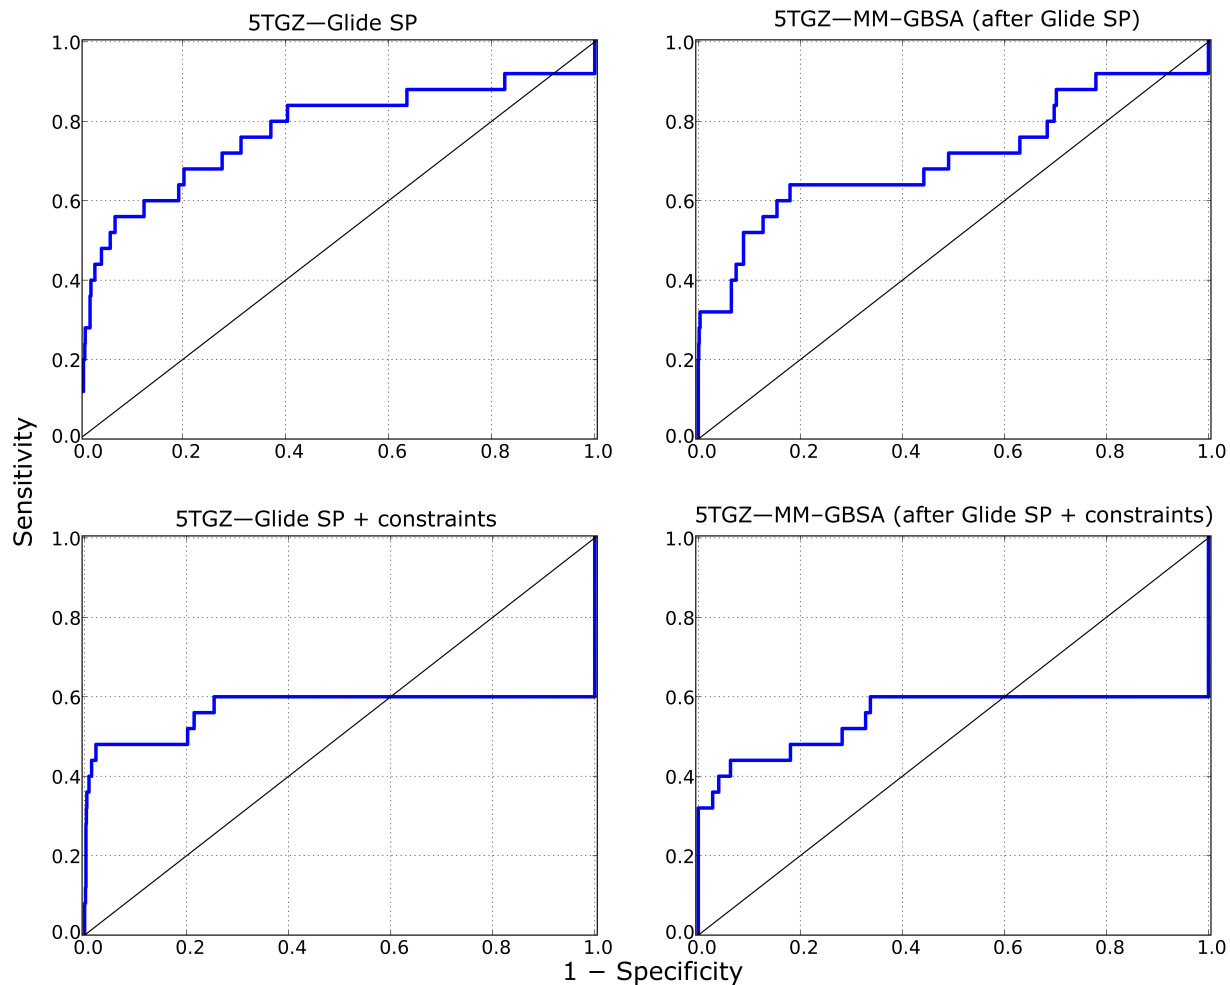

Figure S12: Receiver operating characteristic curves from the validation of docking with Glide to CB1 model based on PDB ID: 5TGZ.

# 1 Abbreviations Used

BEDROC, Boltzmann-enhanced discrimination of the receiver operating characteristic; CB1, cannabinoid receptor type 1; CI, confidence interval; DS, docking score; EF, enrichment factor; HBA, (number of) hydrogen bond acceptor(s); HBD, (number of) hydrogen bond donor(s); ICL3, intracellular loop 3;  $K_i$ , inhibition constant; MD, molecular dynamics; MM-GBSA, molecular mechanics-generalized Born surface area; MW, molecular weight; PDB, Protein Data Bank; PSA, polar surface area; QSAR, quantitative structure—activity relationship; RMSD, root-mean-square deviation; RMSE, root-mean-square error; SD, standard deviation; SEM, standard error of measurement; SP, standard precision; TM, transmembrane (helix); VS, virtual screening; XP, extra precision.

## References

- (1) Manera, C., Cascio, M. G., Benetti, V., Allarà, M., Tuccinardi, T., Martinelli, A., Saccomanni, G., Vivoli, E., Ghelardini, C., Di Marzo, V., and Ferrarini, P. L. (2007) New 1,8-Naphthyridine and Quinoline Derivatives as CB2 Selective Agonists. *Bioorg. Med. Chem. Lett.* *17*, 6505–6510.
- (2) Burstein, S. H. (2014) The Cannabinoid Acids, Analogs and Endogenous Counterparts. *Bioorg. Med. Chem.* *22*, 2830–2843.
- (3) Hua, T., Vemuri, K., Nikas, S. P., Laprairie, R. B., Wu, Y., Qu, L., Pu, M., Korde, A., Jiang, S., Ho, J.-H., Han, G. W., Ding, K., Li, X., Liu, H., Hanson, M. A., Zhao, S., Bohn, L. M., Makriyannis, A., Stevens, R. C., and Liu, Z.-J. (2017) Crystal Structures of Agonist-Bound Human Cannabinoid Receptor CB1. *Nature* *547*, 468–471.
- (4) Durdagi, S., Kapou, A., Kourouli, T., Andreou, T., Nikas, S. P., Nahmias, V. R., Papa-hatjis, D. P., Papadopoulos, M. G., and Mavromoustakos, T. (2007) The Application of 3D-QSAR Studies for Novel Cannabinoid Ligands Substituted at the C1' Position

- of the Alkyl Side Chain on the Structural Requirements for Binding to Cannabinoid Receptors CB1 and CB2. *J. Med. Chem.* *50*, 2875–2885.
- (5) Papahatjis, D. P., Kourouli, T., Abadji, V., Goutopoulos, A., and Makriyannis, A. (1998) Pharmacophoric Requirements for Cannabinoid Side Chains: Multiple Bond and C1'-Substituted  $\Delta^8$ -Tetrahydrocannabinols. *J. Med. Chem.* *41*, 1195–1200.
- (6) Brizzi, A., Cascio, M. G., Frosini, M., Ligresti, A., Aiello, F., Biotti, I., Brizzi, V., Pertwee, R. G., Corelli, F., and Di Marzo, V. (2011) Resorcinol-sn-glycerol Derivatives: Novel 2-Arachidonoylglycerol Mimetics Endowed with High Affinity and Selectivity for Cannabinoid Type 1 Receptor. *J. Med. Chem.* *54*, 8278–8288.
- (7) Cheng, Y.-X., Pourashraf, M., Luo, X., Srivastava, S., Walpole, C., Salois, D., Stone, S., Payza, K., Lessard, E., Yu, X. H., and Tomaszewski, M. J. (2012)  $\gamma$ -Carbolines: A Novel Class of Cannabinoid Agonists with High Aqueous Solubility and Restricted CNS Penetration. *Bioorg. Med. Chem. Lett.* *22*, 1619–1624.
- (8) Mauler, F., Mittendorf, J., Horváth, E., and De Vry, J. (2002) Characterization of the Diarylether Sulfonylester (-)-(R)-3-(2-hydroxymethylindanyl-4-oxy)phenyl-4,4,4-trifluoro-1-sulfonate (BAY 38-7271) as a Potent Cannabinoid Receptor Agonist with Neuroprotective Properties. *J. Pharmacol. Exp. Ther.* *302*, 359–368.
- (9) De Vry, J., Denzer, D., Reissmueller, E., Eijckenboom, M., Heil, M., Meier, H., and Mauler, F. (2004) 3-[2-cyano-3-(trifluoromethyl)phenoxy]phenyl-4,4,4-trifluoro-1-butananesulfonate (BAY 59-3074): A Novel Cannabinoid Cb1/Cb2 Receptor Partial Agonist with Antihyperalgesic and Antiallodynic Effects. *J. Pharmacol. Exp. Ther.* *310*, 620–632.
- (10) Govaerts, S. J., Hermans, E., and Lambert, D. M. (2004) Comparison of Cannabinoid Ligands Affinities and Efficacies in Murine Tissues and in Transfected Cells Expressing Human Recombinant Cannabinoid Receptors. *Eur. J. Pharm. Sci.* *23*, 233–243.

- (11) Kanyonyo, M., Govaerts, S. J., Hermans, E., Poupaert, J. H., and Lambert, D. M. (1999) 3-Alkyl-(5,5-diphenyl)imidazolidinediones as New Cannabinoid Receptor Ligands. *Bioorg. Med. Chem. Lett.* *9*, 2233–2236.
- (12) Schoeder, C. T., Hess, C., Madea, B., Meiler, J., and Müller, C. E. (2018) Pharmacological Evaluation of New Constituents of “Spice”: Synthetic Cannabinoids Based on Indole, Indazole, Benzimidazole and Carbazole Scaffolds. *Forensic Toxicol.* *36*, 385–403.
- (13) Pertwee, R. G. (1997) Pharmacology of Cannabinoid CB1 and CB2 Receptors. *Pharmacol. Ther.* *74*, 129–180.
- (14) Huffman, J. W., Padgett, L. W., Isherwood, M. L., Wiley, J. L., and Martin, B. R. (2006) 1-Alkyl-2-aryl-4-(1-naphthoyl) pyrroles: New High Affinity Ligands for the Cannabinoid CB1 and CB2 Receptors. *Bioorg. Med. Chem. Lett.* *16*, 5432–5435.
- (15) Martin-Couce, L., Martin-Fontecha, M., Capolicchio, S., Lopez-Rodriguez, M. L., and Ortega-Gutierrez, S. (2011) Development of Endocannabinoid-Based Chemical Probes for the Study of Cannabinoid Receptors. *J. Med. Chem.* *54*, 5265–5269.
- (16) Rempel, V., Volz, N., Hinz, S., Karcz, T., Meliciani, I., Nieger, M., Wenzel, W., Brase, S., and Muller, C. E. (2012) 7-Alkyl-3-benzylcoumarins: A Versatile Scaffold for the Development of Potent and Selective Cannabinoid Receptor Agonists and Antagonists. *J. Med. Chem.* *55*, 7967–7977.
- (17) Banister, S. D., Stuart, J., Kevin, R. C., Edington, A., Longworth, M., Wilkinson, S. M., Beinat, C., Buchanan, A. S., Hibbs, D. E., Glass, M., Connor, M., McGregor, I. S., and Kassiou, M. (2015) Effects of Bioisosteric Fluorine in Synthetic Cannabinoid Designer Drugs JWH-018, AM-2201, UR-144, XLR-11, PB-22, 5F-PB-22, APICA, and STS-135. *ACS Chem. Neurosci.* *6*, 1445–1458.
- (18) Frost, J. M., Dart, M. J., Tietje, K. R., Garrison, T. R., Grayson, G. K., Daza, A. V., El-Kouhen, O. F., Miller, L. N., Li, L., Yao, B. B., Hsieh, G. C., Pai, M., Zhu, C. Z.,

- Chandran, P., and Meyer, M. D. (2008) Indol-3-yl-tetramethylcyclopropyl Ketones: Effects of Indole Ring Substitution on CB2 Cannabinoid Receptor Activity. *J. Med. Chem.* 51, 1904–1912.
- (19) Rosati, O., Messina, F., Pelosi, A., Curini, M., Petrucci, V., Gertsch, J., and Chicca, A. (2014) One-pot Heterogeneous Synthesis of  $\Delta^3$ -Tetrahydrocannabinol Analogues and Xanthenes Showing Differential Binding to CB1 and CB2 Receptors. *Eur. J. Med. Chem.* 85, 77–86.
- (20) Lan, R., Liu, Q., Fan, P., Lin, S., Fernando, S. R., McCallion, D., Pertwee, R., and Makriyannis, A. (1999) Structure-Activity Relationships of Pyrazole Derivatives as Cannabinoid Receptor Antagonists. *J. Med. Chem.* 42, 769–776.
- (21) Lan, R., Lu, Q., Fan, P., Gatley, J., Volkow, N. D., Fernando, S. R., Pertwee, R., and Makriyannis, A. (1999) Design and Synthesis of the CB1 Selective Cannabinoid Antagonist AM281: A Potential Human SPECT Ligand. *AAPS PharmSci* 1, 39–45.
- (22) Hua, T., Vemuri, K., Pu, M., Qu, L., Han, G. W., Wu, Y., Zhao, S., Shui, W., Li, S., Korde, A., Laprairie, R. B., Stahl, E. L., Ho, J.-H., Zvonok, N., Zhou, H., Kufareva, I., Wu, B., Zhao, Q., Hanson, M. A., Bohn, L. M., Makriyannis, A., Stevens, R. C., and Liu, Z.-J. (2016) Crystal Structure of the Human Cannabinoid Receptor CB1. *Cell* 167, 750–762.
- (23) Randall, P., Vemuri, V., Segovia, K., Torres, E. F., Hosmer, S., Nunes, E., Santerre, J., Makriyannis, A., and Salamone, J. (2010) The Novel Cannabinoid CB1 Antagonist AM6545 Suppresses Food Intake and Food-Reinforced Behavior. *Pharmacol., Biochem. Behav.* 97, 179–184.
- (24) Carpino, P. A., Griffith, D. A., Sakya, S., Dow, R. L., Black, S. C., Hadcock, J. R., Iredale, P. A., Scott, D. O., Fichtner, M. W., Rose, C. R., Day, R., Dibrino, J., Butler, M., Debartolo, D. B., Dutcher, D., Gautreau, D., Lizano, J. S., O’connor, R. E.,

- Sands, M. A., Kelly-Sullivan, D., and Ward, K. M. (2006) New Bicyclic Cannabinoid Receptor-1 (CB1-R) Antagonists. *Bioorg. Med. Chem. Lett.* *16*, 731–736.
- (25) Dow, R. L., Carpino, P. A., Gautreau, D., Hadcock, J. R., Iredale, P. A., Kelly-Sullivan, D., Lizano, J. S., O'Connor, R. E., Schneider, S. R., Scott, D. O., and Ward, K. M. (2012) Design of a Potent CB1 Receptor Antagonist Series: Potential Scaffold for Peripherally-Targeted Agents. *ACS Med. Chem. Lett.* *3*, 397–401.
- (26) Dow, R. L., Carpino, P. A., Hadcock, J. R., Black, S. C., Iredale, P. A., DaSilva-Jardine, P., Schneider, S. R., Paight, E. S., Griffith, D. A., Scott, D. O., O'Connor, R. E., and Nduaka, C. I. (2009) Discovery of 2-(2-Chlorophenyl)-3-(4-chlorophenyl)-7-(2,2-difluoropropyl)-6,7-dihydro-2H-pyrazolo[3, 4-f][1,4]oxazepin-8(5H)-one (PF-514273), a Novel, Bicyclic Lactam-Based Cannabinoid-1 Receptor Antagonist for the Treatment of Obesity. *J. Med. Chem.* *52*, 2652–2655.
- (27) Wustrow, D. J., Maynard, G. D., Yuan, J., Zhao, H., Mao, J., Guo, Q., Kershaw, M., Hammer, J., Brodbeck, R. M., Near, K. E., Zhou, D., Beers, D. S., Chenard, B. L., Krause, J. E., and Hutchison, A. J. (2008) Aminopyrazine CB1 Receptor Inverse Agonists. *Bioorg. Med. Chem. Lett.* *18*, 3376–3381.
- (28) Dow, R. L., Hadcock, J. R., Scott, D. O., Schneider, S. R., Paight, E. S., Iredale, P. A., Carpino, P. A., Griffith, D. A., Hammond, M., and DaSilva-Jardine, P. (2009) Bioisosteric Replacement of the Hydrazone Pharmacophore of the Cannabinoid-1 Receptor Antagonist SR141716A. Part I: Potent, Orally-Active 1,4-Disubstituted Imidazoles. *Bioorg. Med. Chem. Lett.* *19*, 5351–5354.
- (29) Black, M. D., Stevens, R. J., Rogacki, N., Featherstone, R. E., Senyah, Y., Giardino, O., Borowsky, B., Stemmelin, J., Cohen, C., Pichat, P., Arad, M., Barak, S., De Levie, A., Weiner, I., Griebel, G., and Varty, G. B. (2011) AVE1625, a Cannabinoid CB1 Receptor Antagonist, as a Co-Treatment with Antipsychotics for Schizophrenia: Improvement

- in Cognitive Function and Reduction of Antipsychotic-Side Effects in Rodents. *Psychopharmacology* 215, 149–163.
- (30) Tam, J., Cinar, R., Liu, J., Godlewski, G., Wesley, D., Jourdan, T., Szanda, G., Mukhopadhyay, B., Chedester, L., Liow, J.-S., Innis, R. B., Cheng, K., Rice, K. C., Deschamps, J. R., Chorvat, R. J., McElroy, J. F., and Kunos, G. (2012) Peripheral Cannabinoid-1 Receptor Inverse Agonism Reduces Obesity by Reversing Leptin Resistance. *Cell Metab.* 16, 167–179.
- (31) Cinar, R., Iyer, M. R., Liu, Z., Cao, Z., Jourdan, T., Erdelyi, K., Godlewski, G., Szanda, G., Liu, J., Park, J. K., Mukhopadhyay, B., Rosenberg, A. Z., Liow, J.-S., Lorenz, R. G., Pacher, P., Innis, R. B., and Kunos, G. (2016) Hybrid Inhibitor of Peripheral Cannabinoid-1 Receptors and Inducible Nitric Oxide Synthase Mitigates Liver Fibrosis. *JCI Insight* 1, e87336.
- (32) Ruiu, S., Pinna, G. A., Marchese, G., Mussinu, J.-M., Saba, P., Tambaro, S., Casti, P., Vargiu, R., and Pani, L. (2003) Synthesis and Characterization of NESS 0327: A Novel Putative Antagonist of the CB1 Cannabinoid Receptor. *J. Pharmacol. Exp. Ther.* 306, 363–370.
- (33) Wiley, J. L., Breivogel, C. S., Mahadevan, A., Pertwee, R. G., Cascio, M. G., Bolognini, D., Huffman, J. W., Walentiny, D. M., Vann, R. E., Razdan, R. K., and Martin, B. R. (2011) Structural and Pharmacological Analysis of O-2050, a Putative Neutral Cannabinoid CB1 Receptor Antagonist. *Eur. J. Pharmacol.* 651, 96–105.
- (34) Griffith, D. A., Hadcock, J. R., Black, S. C., Iredale, P. A., Carpino, P. A., DaSilva-Jardine, P., Day, R., DiBrino, J., Dow, R. L., Landis, M. S., O'Connor, R. E., and Scott, D. O. (2009) Discovery of 1-[9-(4-chlorophenyl)-8-(2-chlorophenyl)-9H-purin-6-yl]-4-ethylaminopiperidine-4-carboxylic Acid Amide Hydrochloride (CP-945,598), a



- Novel, Potent, and Selective Cannabinoid Type 1 Receptor Antagonist. *J. Med. Chem.* *52*, 234–237.
- (35) Donohue, S. R., Halldin, C., Schou, M., Hong, J., Phebus, L., Chernet, E., Hitchcock, S. A., Gardinier, K. M., Ruley, K. M., Krushinski, J. H., Schaus, J., and Pike, V. W. (2008) Radiolabeling of a High Potency Cannabinoid Subtype-1 Receptor Ligand, N-(4-fluoro-benzyl)-4-(3-(piperidin-1-yl)-indole-1-sulfonyl)benzamide (Pip-1SB), with carbon-11 or fluorine-18. *J. Label. Compd. Radiopharm.* *51*, 146–152.
- (36) Alig, L., Alsenz, J., Andjelkovic, M., Bendels, S., Bénardeau, A., Bleicher, K., Bourson, A., David-Pierson, P., Guba, W., Hildbrand, S., Kube, D., Lübbers, T., Mayweg, A. V., Narquizian, R., Neidhart, W., Nettekoven, M., Plancher, J.-M., Rocha, C., Rogers-Evans, M., Röver, S., Schneider, G., Taylor, S., and Waldmeier, P. (2008) Benzodioxoles: Novel Cannabinoid-1 Receptor Inverse Agonists for the Treatment of Obesity. *J. Med. Chem.* *51*, 2115–2127.
- (37) Lambert, D. M., and Fowler, C. J. (2005) The Endocannabinoid System: Drug Targets, Lead Compounds, and Potential Therapeutic Applications. *J. Med. Chem.* *48*, 5059–5087.
- (38) Shao, Z., Yin, J., Chapman, K., Grzemska, M., Clark, L., Wang, J., and Rosenbaum, D. M. (2016) High-Resolution Crystal Structure of the Human CB1 Cannabinoid Receptor. *Nature* *540*, 602–606.
